# Supplementary material for: PhyloSort: a user-friendly phylogenetic sorting tool and its application to estimating the cyanobacterial contribution to the nuclear genome of Chlamydomonas
Source: Springer Nature journal article supplement (doi:10.1186/1471-2148-8-6), 2008-01-01
Supplement: Additional file 2 [file 1471-2148-8-6-s2.doc]

## Distribution of Gene Ontology terms within the predicted cyanobacterial genes with a bootstrap support ≥ 50%


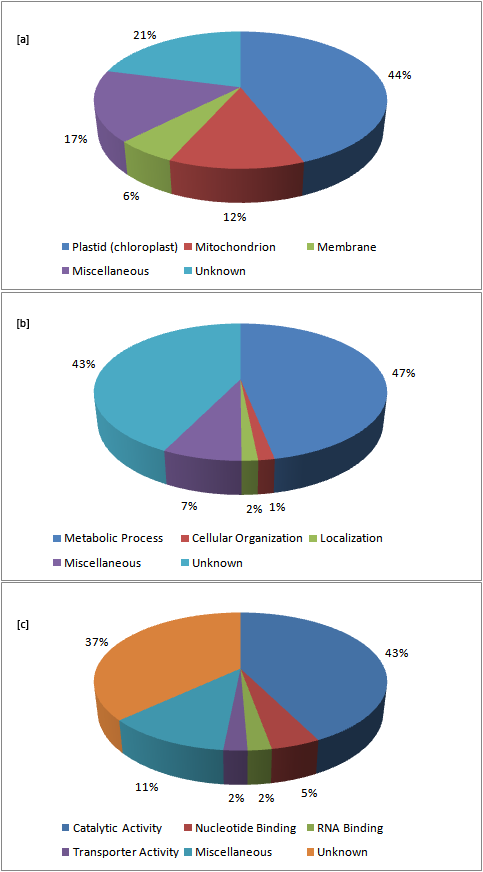


[a] cellular components, [b] biological processes, and [c] molecular functions.
